# Supplementary material for: In Situ Growth of Ni-MOF Nanorods Array on Ti3C2Tx Nanosheets for Supercapacitive Electrodes
Source: MDPI journal article supplement (doi:10.3390/nano13030610), 2023-02-03
Supplement: s1 [file s1]

# In situ growth of Ni-MOF nanorods array on Ti<sub>3</sub>C<sub>2</sub>T<sub>x</sub> nanosheets for electrodes

Shengzhao Li<sup>a, b</sup>, Yingyi Wang<sup>b</sup>, Yue Li<sup>b</sup>, Jiaqiang Xu<sup>\*,a</sup>, Tie Li<sup>\*,b, c</sup>, Ting Zhang<sup>\*,b</sup>

<sup>a</sup>NEST Lab, Department of Chemistry, College of Sciences, Shanghai University, Shanghai 200444, China

<sup>b</sup>i-Lab, Nano-X Vacuum Interconnected Workstation, Key Laboratory of Multifunction Nanomaterials and Smart Systems, Suzhou Institute of Nano-Tech and Nano-Bionics (SINANO), Chinese Academy of Sciences (CAS), 398 Ruoshui Road, Suzhou, 215123, P. R. China.

<sup>c</sup>Gusu Lab for Advanced Materials, Suzhou, 215123, P. R. China

## 1. Methods for calculation of specific capacitance

### CV test

The gravimetric capacitances were calculated according to the following equations:

$$C_g = \frac{\int I dv}{2vm\Delta V}$$

Where  $C_g$  (F g<sup>-1</sup>) is the gravimetric capacitance of the electrode,  $I$  (A) is the charge-discharge current,  $v$  (V/s) is the scan rate,  $m$  (g) is the mass of the working electrode.  $\Delta V$  (V) is voltage window.

### GCD test

The volumetric capacitances were calculated according to the following equations:

$$C_g = \frac{2i_m \int V dt}{V^2}$$

$$E = I/2 \cdot C_g V^2$$

$$P = E/t$$

Where  $C_g$  (F g<sup>-1</sup>) is the gravimetric capacitance of the electrode,  $i_m$  (A) is the charge-discharge current density,  $\Delta t$  (s) is the discharge time,  $V$  (V) represents voltage drop on discharging,  $E$  (Wh·kg<sup>-1</sup>) is the energy density of the electrode,  $P$  (W·kg<sup>-1</sup>) is the power density of the electrode.

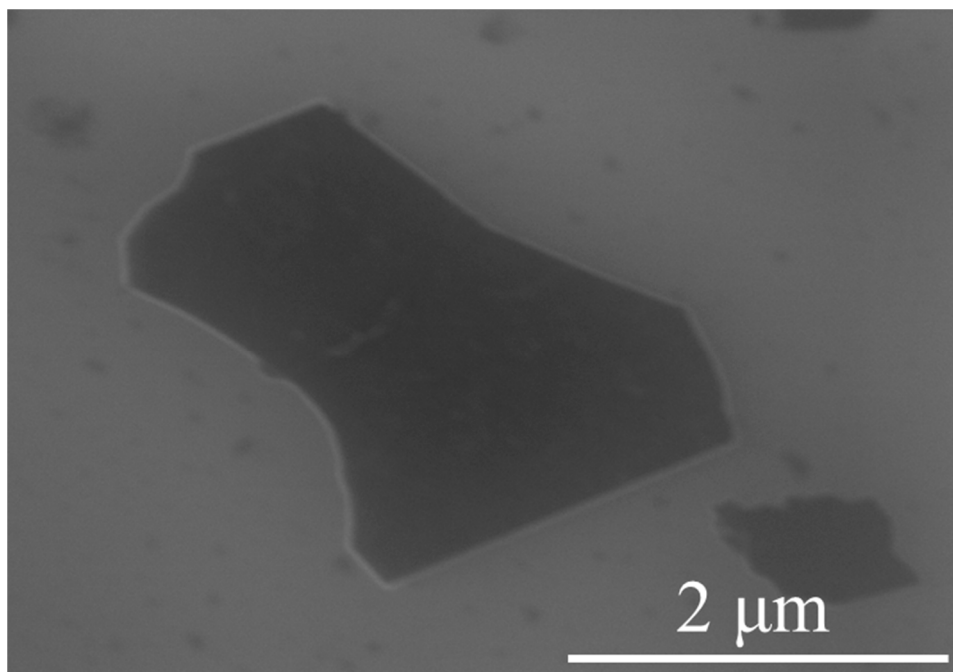

Figure S1. The SEM image of the  $\text{Ti}_3\text{C}_2\text{T}_x$  nanosheets.

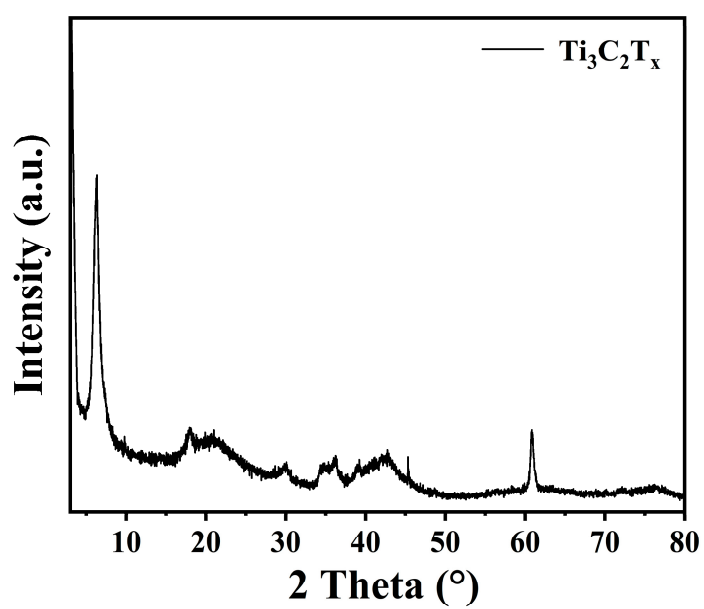

Figure S2. The XRD pattern of the  $\text{Ti}_3\text{C}_2\text{T}_x$ .

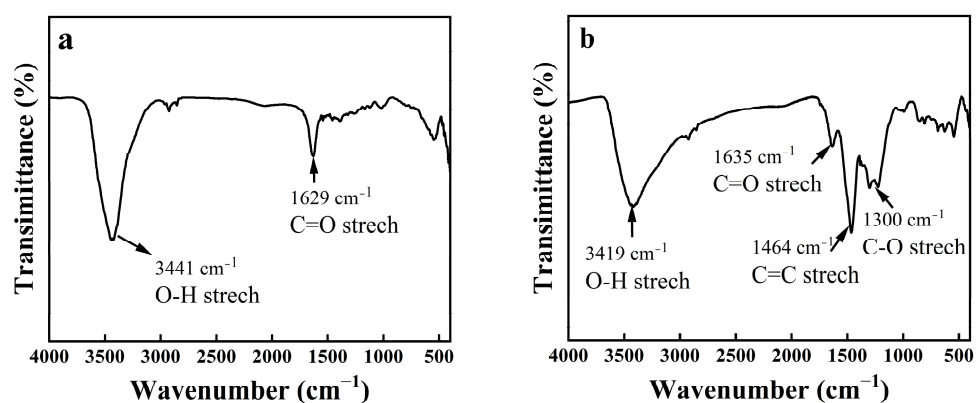

Figure S3. FT-IR pattern of (a)  $\text{Ti}_3\text{C}_2\text{T}_x$  and (b) Ni-MOF, respectively.

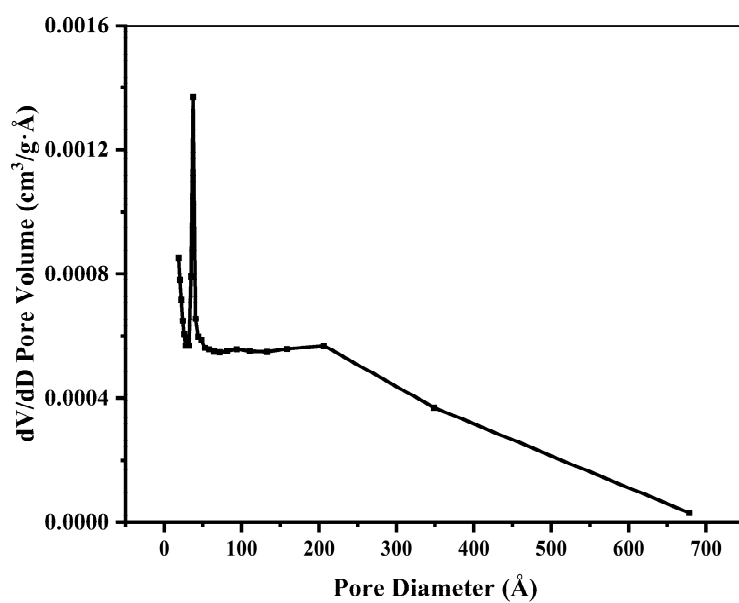

Figure S4. The pore size distribution of Ni-MOF/ $\text{Ti}_3\text{C}_2\text{T}_x$ .

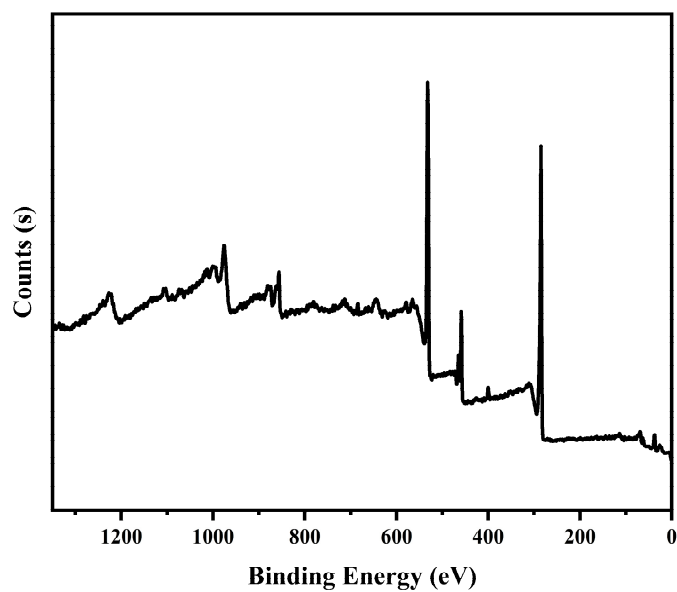

Figure S5. XPS spectra of Ni-MOF/Ti<sub>3</sub>C<sub>2</sub>T<sub>x</sub>.

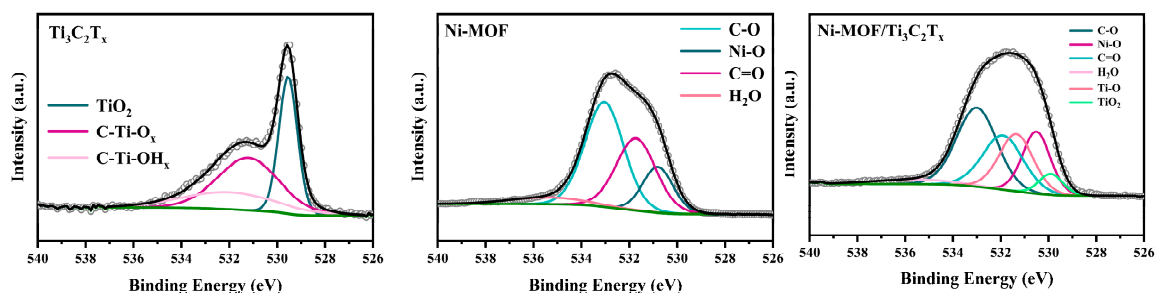

Figure S6. High-resolution O 1s spectra of Ti<sub>3</sub>C<sub>2</sub>T<sub>x</sub>, Ni-MOF, Ni-MOF/Ti<sub>3</sub>C<sub>2</sub>T<sub>x</sub>, respectively.

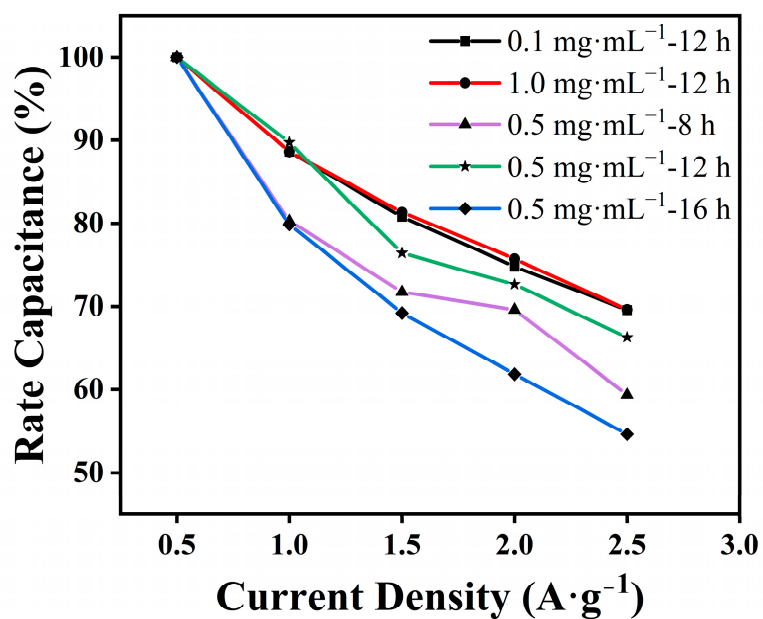

Figure S7. Comparison of rate capacitance of Ni-MOF/Ti<sub>3</sub>C<sub>2</sub>T<sub>x</sub>, with different growth conditions.

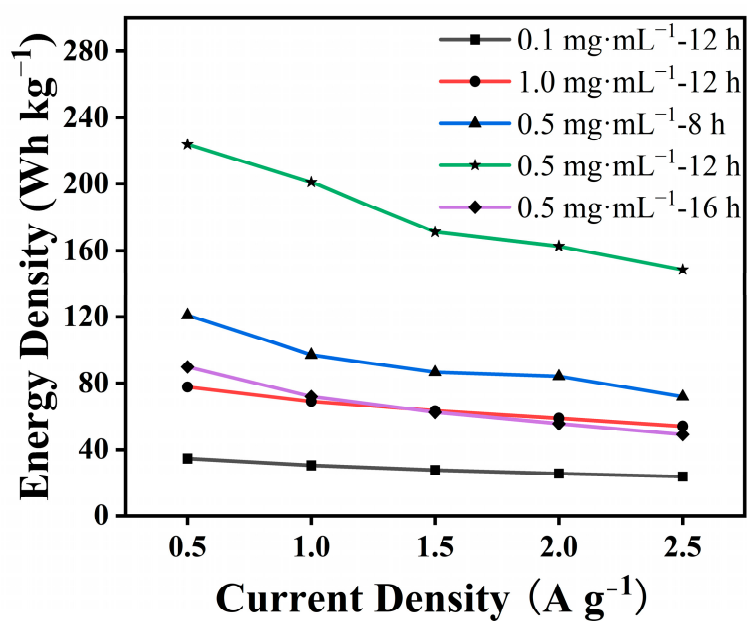

Figure S8. Comparison of energy density of Ni-MOF/Ti<sub>3</sub>C<sub>2</sub>T<sub>x</sub>, with different growth conditions.

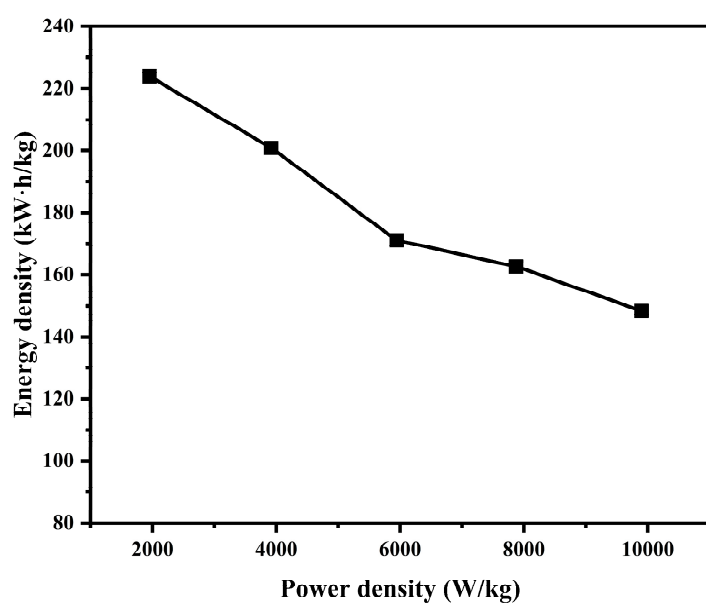

Figure S9. Energy density at different Power density of Ni-MOF/Ti<sub>3</sub>C<sub>2</sub>T<sub>x</sub>.

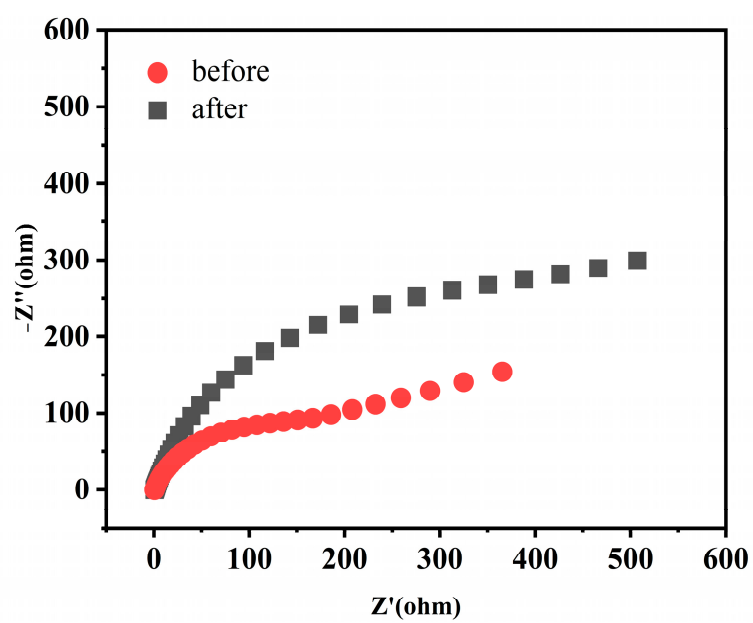

Figure S10. The EIS test of the Ni-MOF/Ti<sub>3</sub>C<sub>2</sub>T<sub>x</sub> before and after stability test.

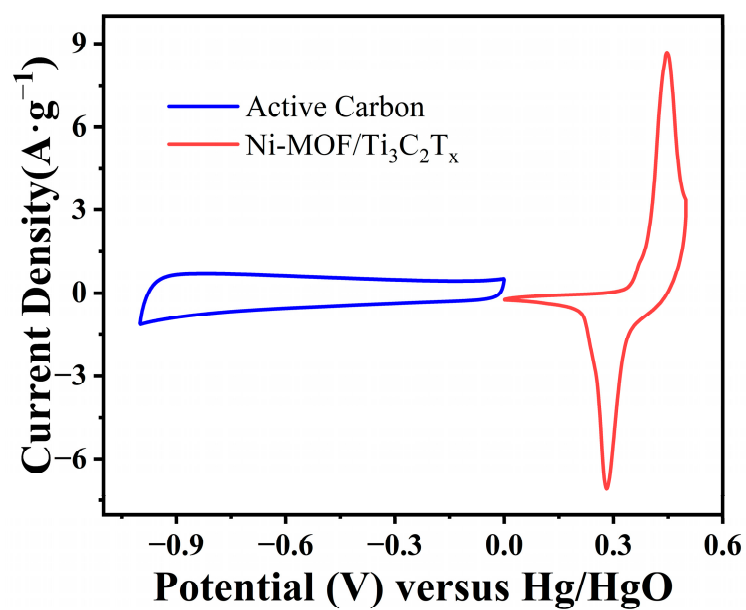

Figure S11. Energy density at different Power density of Ni-MOF/Ti<sub>3</sub>C<sub>2</sub>T<sub>x</sub>.

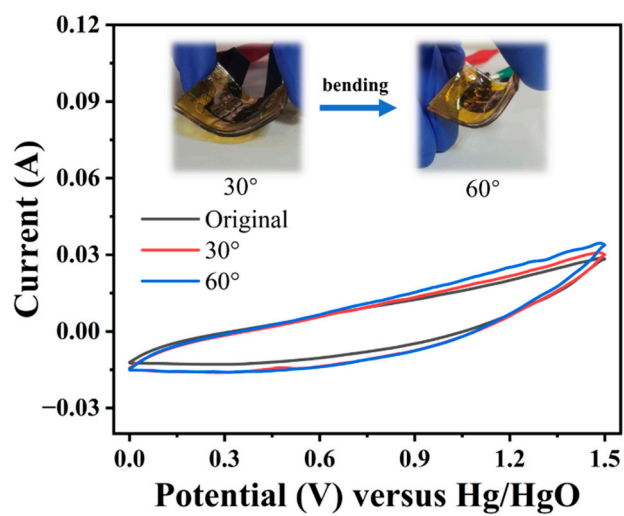

Figure S12. The CV test under original or bending states.
